# Supplementary material for: Enhancing wastewater treatment: a study on steam explosion-biochar derived from Chinese herbal medicine residue for NOR adsorption
Source: Royal Society of Chemistry journal article supplement (doi:10.1039/d5ra04964d), 2025-01-01
Supplement: d5ra04964d1.pdf [file d5ra04964d1.pdf]

## Supporting Information

### **Enhancing Wastewater Treatment: A study on Steam Explosion- Biochar Derived from Chinese Herbal Medicine Residue for NOR Adsorption**

Dong Guo <sup>a, §</sup>, Pengwei Li <sup>a, §</sup>, Lin Meng <sup>a</sup>, Ziheng Zhao <sup>a,c</sup>, Hang Su <sup>a</sup>, Weisheng Feng <sup>a</sup>, Zhijuan Zhang <sup>a, b, \*</sup>

a. College of Pharmacy, Henan University of Chinese Medicine, Zhengzhou 450046, China

b. Collaborative Innovation Center of Research and Development on the Whole Industry Chain of Yu-Yao, Henan Province, Zhengzhou 450046, China

c. Shangqiu Municipal Hospital, Shangqiu 476100, China

\*Corresponding author: Zhijuan Zhang, Email: zhangyan0204@126.com, Jinshui East Road, Zhengzhou, Henan, China, 450046.

§ These authors contributed equally to this work.

## Text S1

### Characterization

The Bruner-Emmett-Teller (BET) surface area, pore size, and total pore volume of each of these materials were determined by using the Specific Surface Area and Pore Size Analysis (Quantachrome IQ2, Quantachrome)) instrument. The surface morphology and composition of activated carbon were examined by scanning electron microscopy (SEM, Zeiss Gemini). The elemental contents of C, H, O, and N in the sample were measured using an organic element analyzer (EA, Elementar UNICUBE). The functional groups of activated carbon were determined with BRUKER TENSOR2-FTIR spectrometer, recording spectra from 4000 cm<sup>-1</sup> to 500 cm<sup>-1</sup>. The powder diffraction measurements were performed using X-ray diffraction (XRD, Bruker D8), with 2θ ranging from 10° to 90°. The fundamental properties of activated carbon were determined by using a Raman spectrometer (Thermo Scientific DXR 3Xi), X-ray photoelectron spectroscopy (XPS, Thermo-Scientific K-Alpha) analysis. The pH<sub>pzc</sub> of activated carbon was measured using a Zeta Potential and particle size analyzer (90 Plus PALS).

## Text S2

Determination of NOR concentration, calculation of adsorption capacity and removal rate.

In the adsorption test, the concentration of residual NOR was determined using an ultraviolet spectrophotometer (U-3900H, Japan) at 273 nm. The experimental NOR adsorption capacity ( $q_e$ , mg·g<sup>-1</sup>) and removal rate (R) on the activated carbon obtained can be determined using the following two equations.

$$q_e = \frac{(C_0 - C_e)V}{m} \quad (1)$$

$$R = \frac{(C_0 - C_e)}{C_0} \times 100\% \quad (2)$$

where  $q_e$  (mg/g) and R (%) are separately the equilibrium adsorption capacity and removal rate of NOR.  $C_0$  (mg/L) is the initial mass concentration of NOR;  $C_e$  (mg/L) is

the equilibrium mass concentration;  $V$  (mL) is the volume of NOR solution;  $m$  (g) is the mass of activated carbon.

### Figure captions

|                 |                                                                                           |
|-----------------|-------------------------------------------------------------------------------------------|
| <b>Fig.S1</b>   | Adsorption of NOR by different adsorbents.                                                |
| <b>Fig. S2a</b> | The FTIR spectra of ASB4 before and after adsorption and NOR.                             |
| <b>Fig. S2b</b> | The Raman spectra of ASB4 before and after adsorption.                                    |
| <b>Fig. S2c</b> | The XPS spectra of ASB4 before and after adsorption.                                      |
| <b>Fig. S2d</b> | The C 1s XPS analysis of ASB4.                                                            |
| <b>Fig. S2e</b> | The C 1s XPS analysis of ASB4 after adsorption.                                           |
| <b>Fig. S2f</b> | The O 1s XPS analysis of ASB4                                                             |
| <b>Fig. S2g</b> | The O 1s XPS analysis of ASB4 after adsorption                                            |
| <b>Fig. S2h</b> | Adsorption capacity of NOR on ASB4 in different concentrations of urea solution           |
| <b>Fig. S2i</b> | Adsorption capacity of NOR on ASB4 in different concentrations of naphthalene solution    |
| <b>Fig. S2j</b> | Adsorption capacity of NOR on ASB4 in different concentrations of NaCl solution           |
| <b>Fig. S3a</b> | Response surface plots of different factors to NOR removal temperature and concentration. |
| <b>Fig. S3b</b> | Response surface plots of different factors to NOR removal temperature and pH.            |
| <b>Fig. S3c</b> | Response surface plots of different factors to NOR removal concentration and pH.          |
| <b>Fig. S4a</b> | Effect of different antibiotics on NOR adsorption                                         |
| <b>Fig. S4b</b> | NOR adsorption effect comparison of ASB4 and commercial biochar                           |

### Table captions

|                 |                                                                                             |
|-----------------|---------------------------------------------------------------------------------------------|
| <b>Table S1</b> | Adsorption kinetics, isotherm models and thermodynamic equations.                           |
| <b>Table S2</b> | Lists of maximum NOR adsorption capacity on various biochar and other adsorption materials. |
| <b>Table S3</b> | Thermodynamic parameters for NOR adsorption.                                                |
| <b>Table S4</b> | Pore characters of ASB4 before and after adsorption.                                        |
| <b>Table S5</b> | ANOVA for quadratic models.                                                                 |
| <b>Table S6</b> | Direct Operating Costs analysis of ASB4 production.                                         |

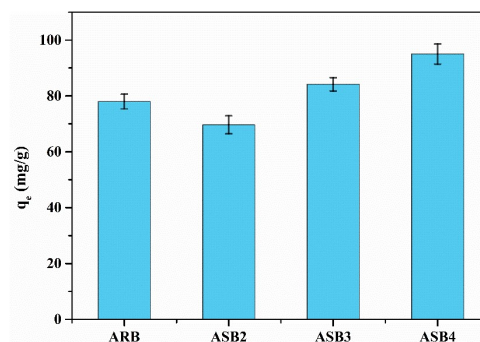

**Fig.S1.** Adsorption of NOR by different adsorbents. (pH=8,  $C_0$ =50 mg/L)

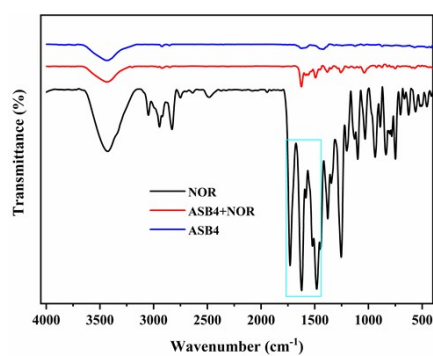

(a)

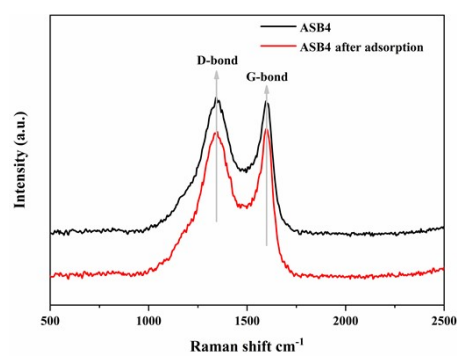

(b)

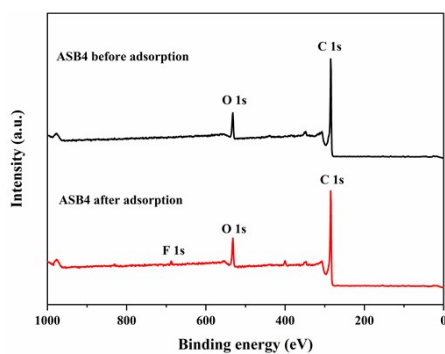

(c)

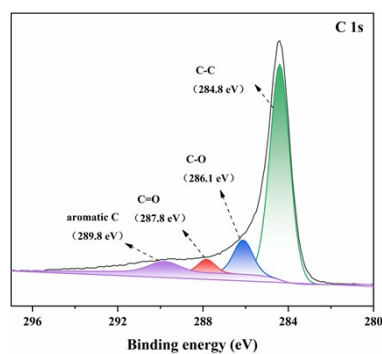

(d)

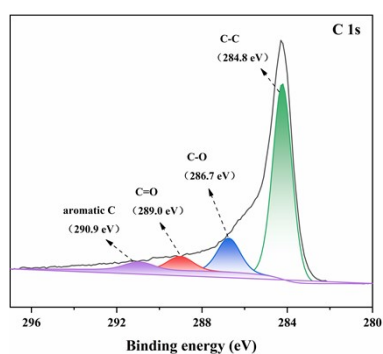

(e)

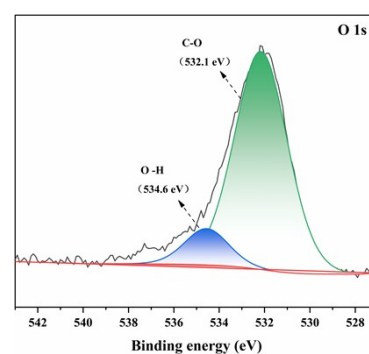

(f)

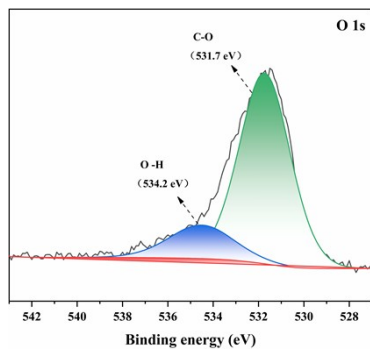

(g)

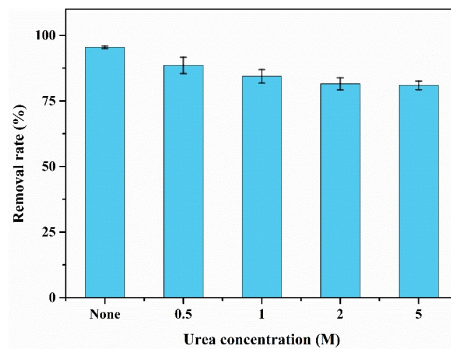

(h)

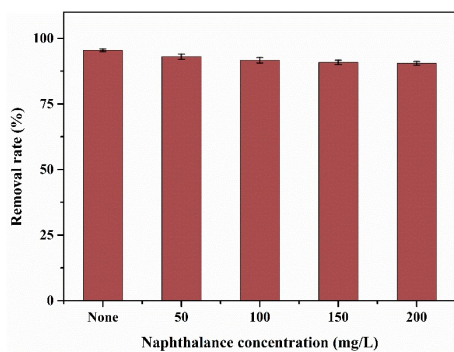

(i)

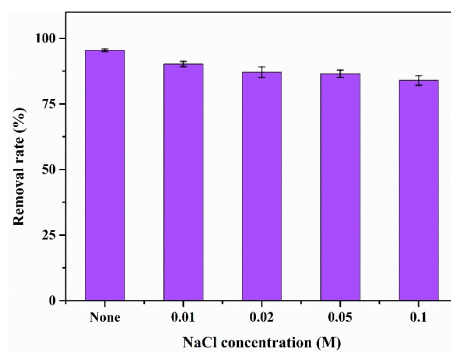

(j)

**Fig. S2.** (a) FTIR spectra of ASB4 before and after adsorption and NOR, (b) Raman spectrum of ASB4 before and after adsorption, (c) XPS spectra of ASB4 before and after adsorption, (d) C 1s XPS analysis of ASB4, (e) C 1s XPS analysis of ASB4 after adsorption, (f) O 1s XPS analysis of ASB4, (g) O 1s XPS analysis of ASB4 after adsorption, Adsorption capacity of NOR on ASB4 in different concentrations of (h) urea solution, (i) naphthalene solution and (j) NaCl solution. (pH=8,  $C_0=50$  mg/L)

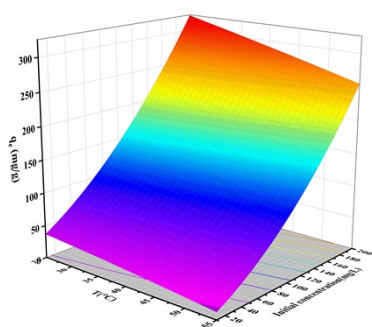

(a)

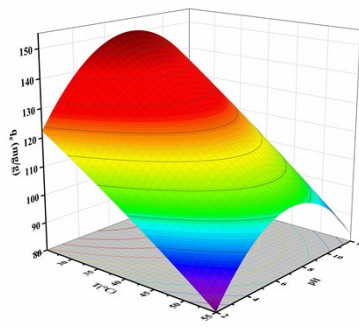

(b)

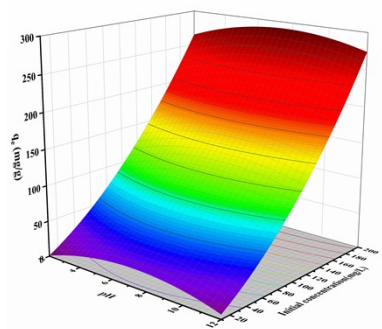

(c)

**Fig. S3.** Response surface plots of different factors to NOR removal (a) temperature and concentration, (b) temperature and pH, and (c) pH and concentration.

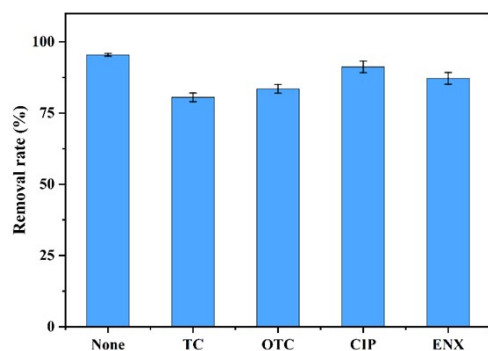

(a)

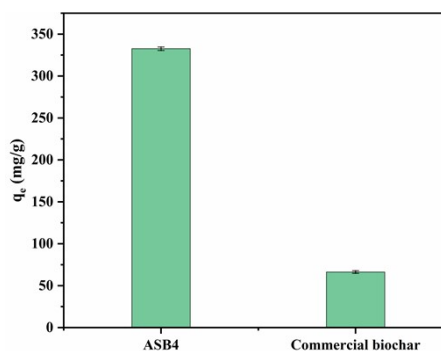

(b)

**Fig. S4.** Effect of different antibiotics on NOR adsorption (a) (pH=8,  $C_0$ =50 mg/L) and NOR adsorption effect comparison of ASB4 and commercial biochar (b) (pH=8,  $C_0$ =200 mg/L).

**Table S1.** Adsorption kinetics, isotherm models and thermodynamic equations.

| Adsorption model | Type                  | Equation*                                                                                             | Parameters                                                                                                                                                                                                                                                                                                                                                                                                                                                                                                                                                                                                                                                                 |
|------------------|-----------------------|-------------------------------------------------------------------------------------------------------|----------------------------------------------------------------------------------------------------------------------------------------------------------------------------------------------------------------------------------------------------------------------------------------------------------------------------------------------------------------------------------------------------------------------------------------------------------------------------------------------------------------------------------------------------------------------------------------------------------------------------------------------------------------------------|
| Kinetics         | PFO                   | $q_t = q_e (1 - e^{-k_t t})$                                                                          | $q_e$ and $q_t$ (mg/g) are the adsorbed amount at an equilibrium concentration, ( $C_e$ , mg/g) and a predetermined time ( $t$ , min), $k_t$ (min <sup>-1</sup> ) is the rate constants.                                                                                                                                                                                                                                                                                                                                                                                                                                                                                   |
|                  | PSO                   | $q_t = \frac{k_2 q_e^2 t}{1 + k_2 q_e t}$                                                             | $k_2$ (min <sup>-1</sup> ) is the rate constants for the pseudo-second order.                                                                                                                                                                                                                                                                                                                                                                                                                                                                                                                                                                                              |
|                  | Elovich               | $q_t = \frac{1}{\beta} \ln(1 + \alpha \beta t)$                                                       | $\alpha$ (mg/(g·min)) is the initial rate constant, $\beta$ (mg/g) is the desorption constant.                                                                                                                                                                                                                                                                                                                                                                                                                                                                                                                                                                             |
|                  | IPD                   | $q_t = k_i t^{0.5} + C_i$                                                                             | $k_i$ (mg/(g·min <sup>0.5</sup> )) is the adsorption rate constants of intraparticle diffusion model and $C_i$ is the constant for film thickness of the intra-particle diffusion model.                                                                                                                                                                                                                                                                                                                                                                                                                                                                                   |
| Isotherm         | Langmuir              | $q_e = \frac{q_m K_L C_e}{1 + K_L C_e}$                                                               | $q_m$ (mg/g) is the maximum adsorption capacity of the adsorbent, $q_e$ (mg/g) is the adsorption capacity at equilibrium, $C_e$ (mg/L) is the adsorbate concentration at equilibrium, $K_L$ (L/mg) is the constant for the affinity between the adsorbate and the adsorbent.                                                                                                                                                                                                                                                                                                                                                                                               |
|                  | Sips                  | $q_e = \frac{q_m K_s C_e^n}{1 + K_s C_e^n}$                                                           | $C_e$ (mg/L) is the equilibrium concentration, $q_m$ (mg/g) is the maximum adsorption capacity of the adsorbent, $K_s$ (L/mg) <sup>n</sup> is the adsorption equilibrium constant, $n$ is indicative of the surface site heterogeneity of the adsorbent.                                                                                                                                                                                                                                                                                                                                                                                                                   |
|                  | Freundlich            | $q_e = K_F C_e^{1/n}$                                                                                 | $K_F$ ((mg <sup>1-n</sup> ·L <sup>n</sup> )/g), $1/n$ is the Freundlich constant, $n$ is a dimensionless Freundlich intensity parameter.                                                                                                                                                                                                                                                                                                                                                                                                                                                                                                                                   |
| Thermodynamic    | Van der Hoff equation | $\Delta G = \Delta H - T \Delta S$                                                                    | $\Delta G$ (kJ/mol) is the Gibbs energy; $K_e$ is the dimensionless equilibrium constant of adsorption; $\gamma$ is the activity coefficient and equal to 1.00, [Adsorbate] <sup>0</sup> represents the standard concentration which is equal to 1 mol·L <sup>-1</sup> ; $K_s$ (L·mg <sup>-1</sup> ) <sup>n</sup> is the equilibrium constant of the best model for isotherm fitting; MW <sub>adsorbate</sub> is the relative molecular weight of the adsorbate (g/mol); $R$ is the ideal gas constant, whose value is 8.314 J/(mol·K); $T$ (K) is absolute temperature; $\Delta H$ (kJ/mol) is the activate denthalpy; and $\Delta S$ is the change in entropy (J/mol/K). |
|                  |                       | $\ln K_e = \frac{\Delta S}{R} - \frac{\Delta H}{RT}$                                                  |                                                                                                                                                                                                                                                                                                                                                                                                                                                                                                                                                                                                                                                                            |
|                  |                       | $K_e = \frac{(1000 \cdot K_s \cdot \text{MW}_{\text{adsorbate}}) \cdot [\text{Adsorbate}]^0}{\gamma}$ |                                                                                                                                                                                                                                                                                                                                                                                                                                                                                                                                                                                                                                                                            |
|                  |                       | $\Delta G = -RT \ln K_e$                                                                              |                                                                                                                                                                                                                                                                                                                                                                                                                                                                                                                                                                                                                                                                            |

**Table S2.** Lists of maximum NOR adsorption capacity on various biochar and other adsorption

materials.

| Raw material                    | BET<br>(m <sup>2</sup> /g) | Total pore<br>Volume<br>(cm <sup>3</sup> /g) | Adsorbent<br>dosage<br>(g/L) | NOR<br>concentration<br>(mg/L) | q <sub>e</sub><br>(mg/g) | Ref.         |
|---------------------------------|----------------------------|----------------------------------------------|------------------------------|--------------------------------|--------------------------|--------------|
| Original kaolin                 | 44                         | 0.233                                        | 0.5                          | 20                             | 30.47                    | <sup>1</sup> |
| Cocoa shells                    | 328.45                     | 1.856                                        | 1                            | 300                            | 134                      | <sup>2</sup> |
| Coffee grounds                  | 46.32                      | -                                            | 1.32                         | 24.69                          | 69.8                     | <sup>3</sup> |
| Algal biochar-clay<br>composite | 221.04                     | 0.24                                         | 0.4                          | 200                            | 192.80                   | <sup>4</sup> |
| Longan seed                     | 420.58                     | 0.277                                        | 0.6                          | 50                             | 139.27                   | <sup>5</sup> |
| Apple branch                    | 331.02                     | 0.215                                        | 0.4                          | 20                             | 81.08                    | <sup>6</sup> |
| Astragalus<br>residue           | 512                        | 0.534                                        | 0.5                          | 200                            | 332                      | This study   |

**Table S3.** Thermodynamic parameters for NOR adsorption.

| Material | $\Delta G$ (kJ/mol) |        | $\Delta H$ (kJ/mol) | $\Delta S$ (J/mol/K) |
|----------|---------------------|--------|---------------------|----------------------|
| ASB4     | 298 K               | -26.06 | -38.52              | -41.24               |
|          | 303 K               | -25.82 |                     |                      |
|          | 313 K               | -25.25 |                     |                      |
|          | 323 K               | -24.99 |                     |                      |

**Table S4.** Pore character of ASB4 before and after adsorption.

| Samples          | S <sub>BET</sub><br>(m <sup>2</sup> /g) | S <sub>Langmuir</sub><br>(m <sup>2</sup> /g) | V <sub>Micro</sub><br>(cm <sup>3</sup> /g) | V <sub>Total</sub><br>(cm <sup>3</sup> /g) | Average pore<br>diameter (nm) |
|------------------|-----------------------------------------|----------------------------------------------|--------------------------------------------|--------------------------------------------|-------------------------------|
| ASB4             | 512                                     | 745                                          | 0.066                                      | 0.534                                      | 4.16                          |
| after adsorption | 146                                     | 222                                          | NA                                         | 0.158                                      | 4.33                          |



**Table S5.** ANOVA for quadratic models.

| Source                  | Sum of squares      | df | Mean square | F value | p-value  |
|-------------------------|---------------------|----|-------------|---------|----------|
| Model                   | $1.518 \times 10^5$ | 9  | 16862.66    | 61.39   | < 0.0001 |
| A-Temperature           | 4465.13             | 1  | 4465.13     | 16.25   | 0.0050   |
| B-initial concentration | 112.50              | 1  | 112.50      | 0.41    | 0.5427   |
| C-pH                    | $1.412 \times 10^5$ | 1  | 1.412E+005  | 513.90  | < 0.0001 |
| AB                      | 25.00               | 1  | 25.00       | 0.091   | 0.7717   |
| AC                      | 462.25              | 1  | 462.25      | 1.68    | 0.2358   |
| BC                      | 4.00                | 1  | 4.00        | 0.015   | 0.9074   |
| A <sup>2</sup>          | 5.81                | 1  | 5.81        | 0.021   | 0.8885   |
| B <sup>2</sup>          | 1932.76             | 1  | 1932.76     | 7.03    | 0.0329   |
| C <sup>2</sup>          | 3872.02             | 1  | 3872.02     | 14.09   | 0.0071   |
| Residual                | 1923.95             | 7  | 274.85      |         |          |
| Lack of Fit             | 1422.75             | 3  | 474.25      | 3.87    | < 0.1156 |
| Pure Error              | 501.20              | 4  | 125.30      |         |          |
| Cor Total               | $1.532 \times 10^5$ | 16 |             |         |          |

**Table S6.** Direct Operating Costs analysis of ASB4 production.

| Sample | Material          | Specification | Price (\$/kg) <sup>a</sup> | Amount (kg) | Total (\$/kg) |
|--------|-------------------|---------------|----------------------------|-------------|---------------|
| ASB4   | AR residue        |               | 0.02                       | 2.85        | 0.52          |
|        | Water             | 18.2 MΩ       | 0.005                      | 20          | 0.1           |
|        | Total DOC (\$/kg) |               |                            |             | 0.62          |

<sup>a</sup> Price was based on: Made-in-China, Focus Technology Co., Ltd. (<https://www.made-in-china.com>).

## References

1. Yang, Y.; Zhong, Z.; Li, J.; Du, H.; Li, Z., *J. Hazard. Mater.* 2022, **430**, 128500.
2. Guy Laurent Zanli, B. L.; Tang, W.; Chen, J., *Environ. Res.* 2022, **214**, 113951.
3. Nguyen, V.-T.; Vo, T.-D.-H.; Nguyen, T.-B.; Dat, N. D.; Huu, B. T.; Nguyen, X.-C.; Tran, T.; Le, T.-N.-C.; Duong, T.-G.-H.; Bui, M.-H.; Dong, C.-D.; Bui, X.-T., *Chemosphere* 2022, **288**, 132577.
4. Maged, A.; Elgarahy, A. M.; Hlawitschka, M. W.; Haneklaus, N. H.; Gupta, A. K.; Bhatnagar, A., *Bioresour. Technol.* 2023, **387**, 129593.
5. Luo, Y.; Chen, J.; Zha, X.; Zhang, J.; Li, J.; Chen, G.; He, X., *J. Clean Prod.* 2024, **467**, 142954.
6. Zou, M.; Tian, W.; Chu, M.; Chen, Z., *Process Saf. Environ. Prot.* 2024, **185**, 435-444.
